# Supplementary material for: Anxiety, Motivation, and Competence in Mathematics and Reading for Children With and Without Learning Difficulties
Source: PubMed Central journal article supplement (PMC8528962; doi:10.3389/fpsyg.2021.704821), 2021-10-07

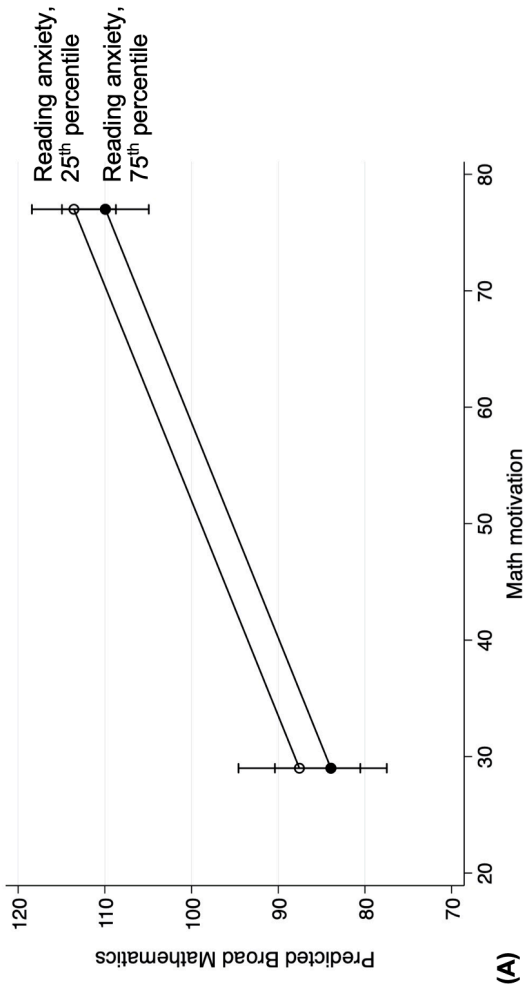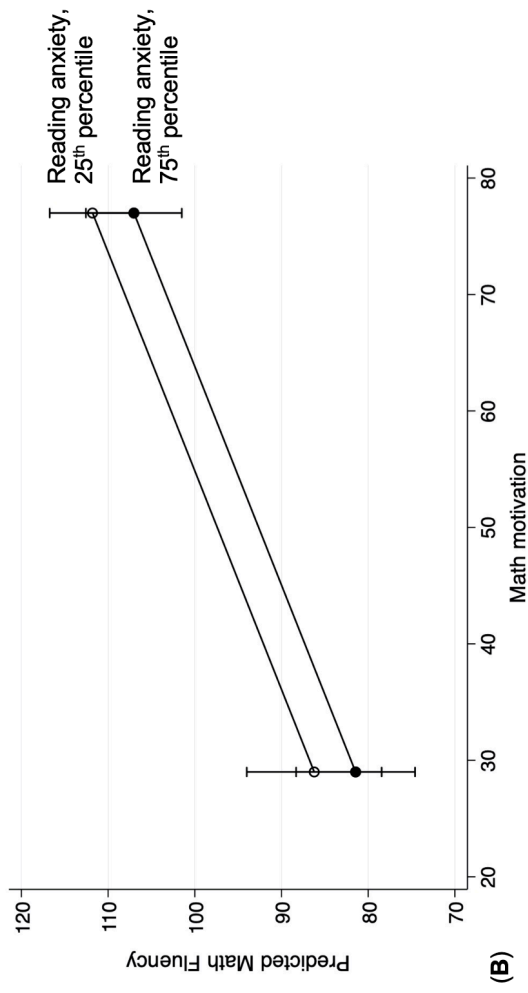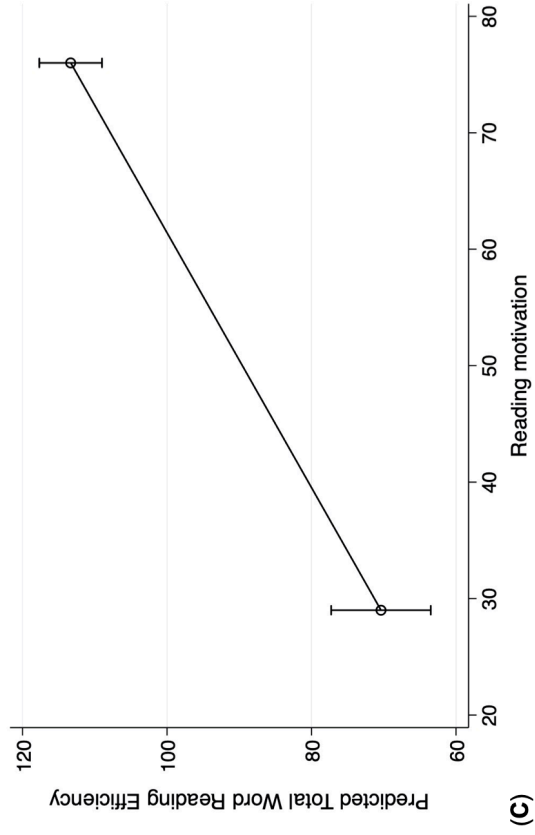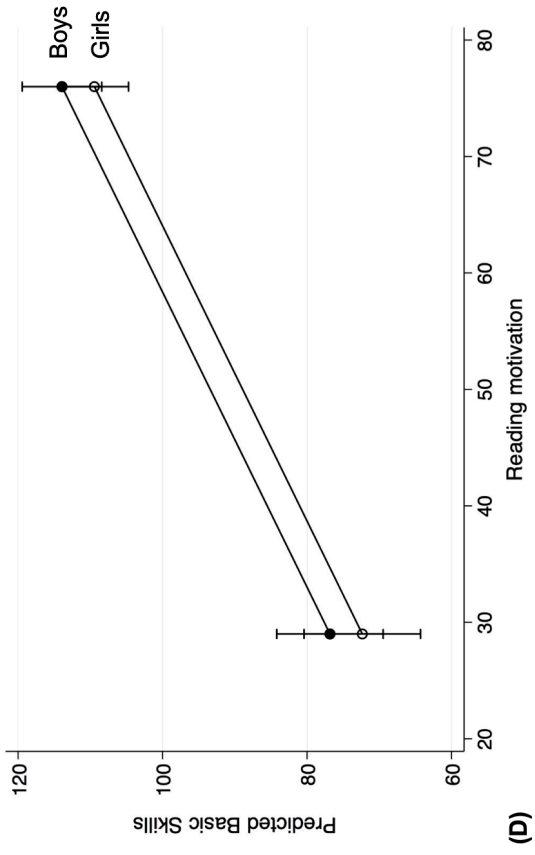

Supplement: Image_1.pdf [file Image_1.pdf]
